# Supplementary material for: Monitoring Antibiotics and Inflammatory Markers in Human Blood: Impact in Choice of Antibiotic Therapy and Used Methods
Source: Preprints.org preprint supplement (doi:10.20944/preprints201911.0163.v1), 2019-11-14
Supplement: Supplementary file 1 [file supplementary]

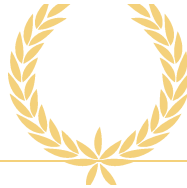

We certify that the following article

## Monitoring antibiotics and inflammatory markers in human blood when choosing antibiotic therapy: Importance and methods

Boris Dzantiev

has undergone English language editing by MDPI. The text has been checked for correct use of grammar and common technical terms, and edited to a level suitable for reporting research in a scholarly journal.

MDPI uses experienced, native English speaking editors. Full details of the editing service can be found at

► <https://www.mdpi.com/authors/english>.

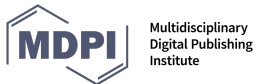

Basel, November 2019

Martyn Rittman, Ph.D.  
English Editing Manager  
[englishediting@mdpi.com](mailto:englishediting@mdpi.com)  
<https://www.mdpi.com/authors/english>
